# Supplementary material for: REstricted Fluid REsuscitation in Sepsis-associated Hypotension (REFRESH): study protocol for a pilot randomised controlled trial
Source: PubMed Central journal article supplement (PMC5576288; doi:10.1186/s13063-017-2137-7), 2017-08-29

# REFRESH

## Enrolment flowchart

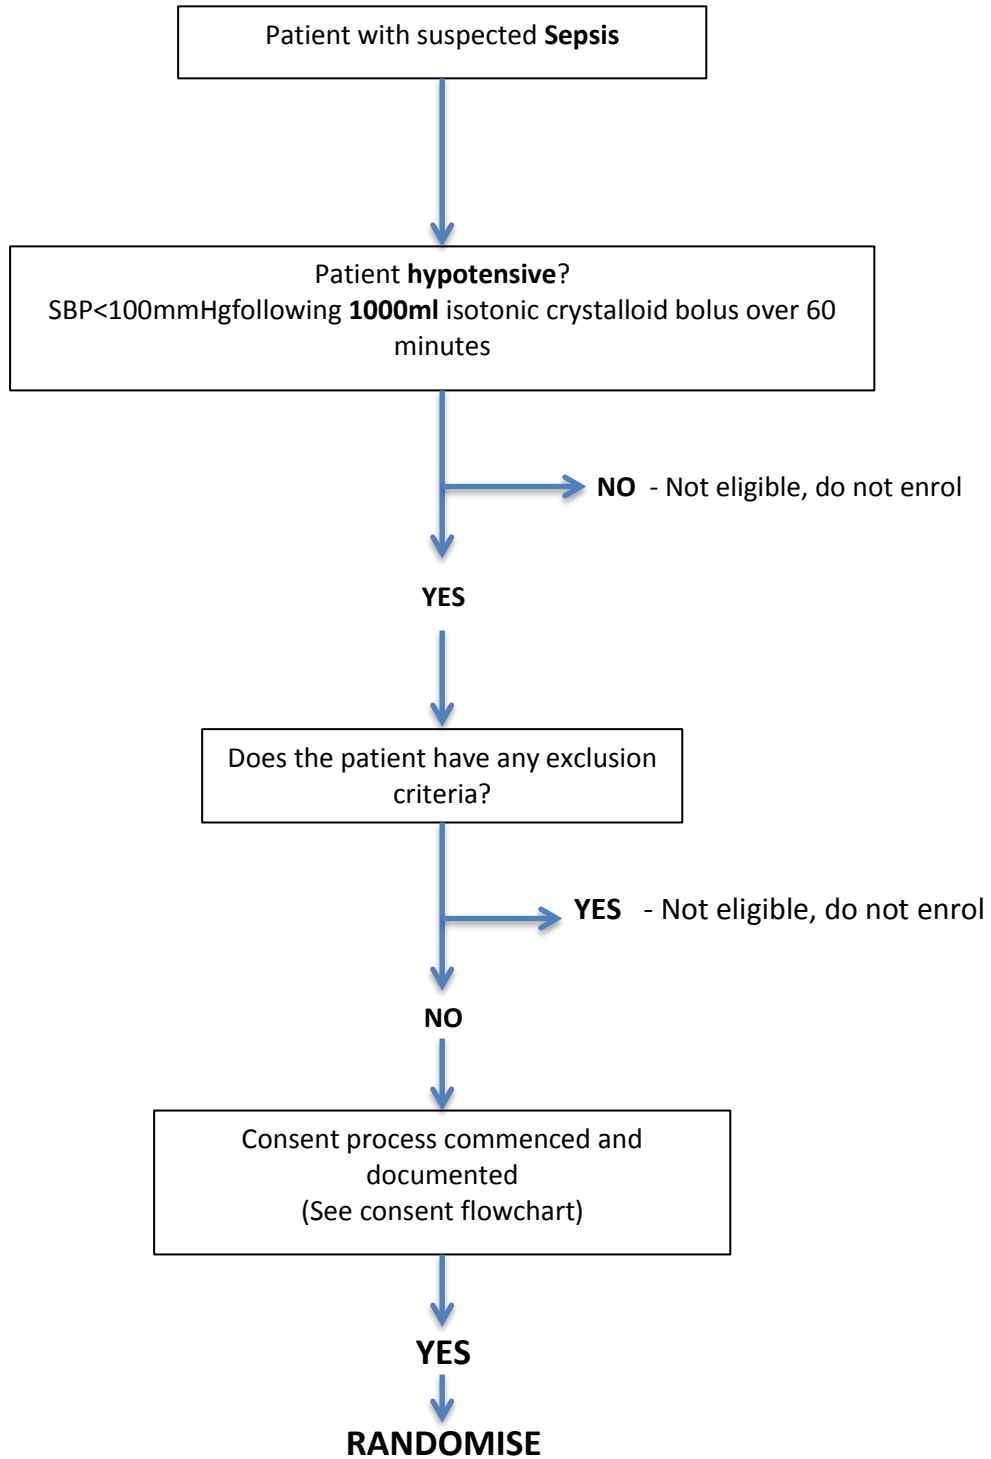

Supplement: 13063_2017_2137_MOESM2_ESM.pdf [file 13063_2017_2137_MOESM2_ESM.pdf]
