# Supplementary material for: REstricted Fluid REsuscitation in Sepsis-associated Hypotension (REFRESH): study protocol for a pilot randomised controlled trial
Source: PubMed Central journal article supplement (PMC5576288; doi:10.1186/s13063-017-2137-7), 2017-08-29
Supplement: 13063_2017_2137_MOESM4_ESM.pdf [file 13063_2017_2137_MOESM4_ESM.pdf]

# REFRESH

## Standard volume arm

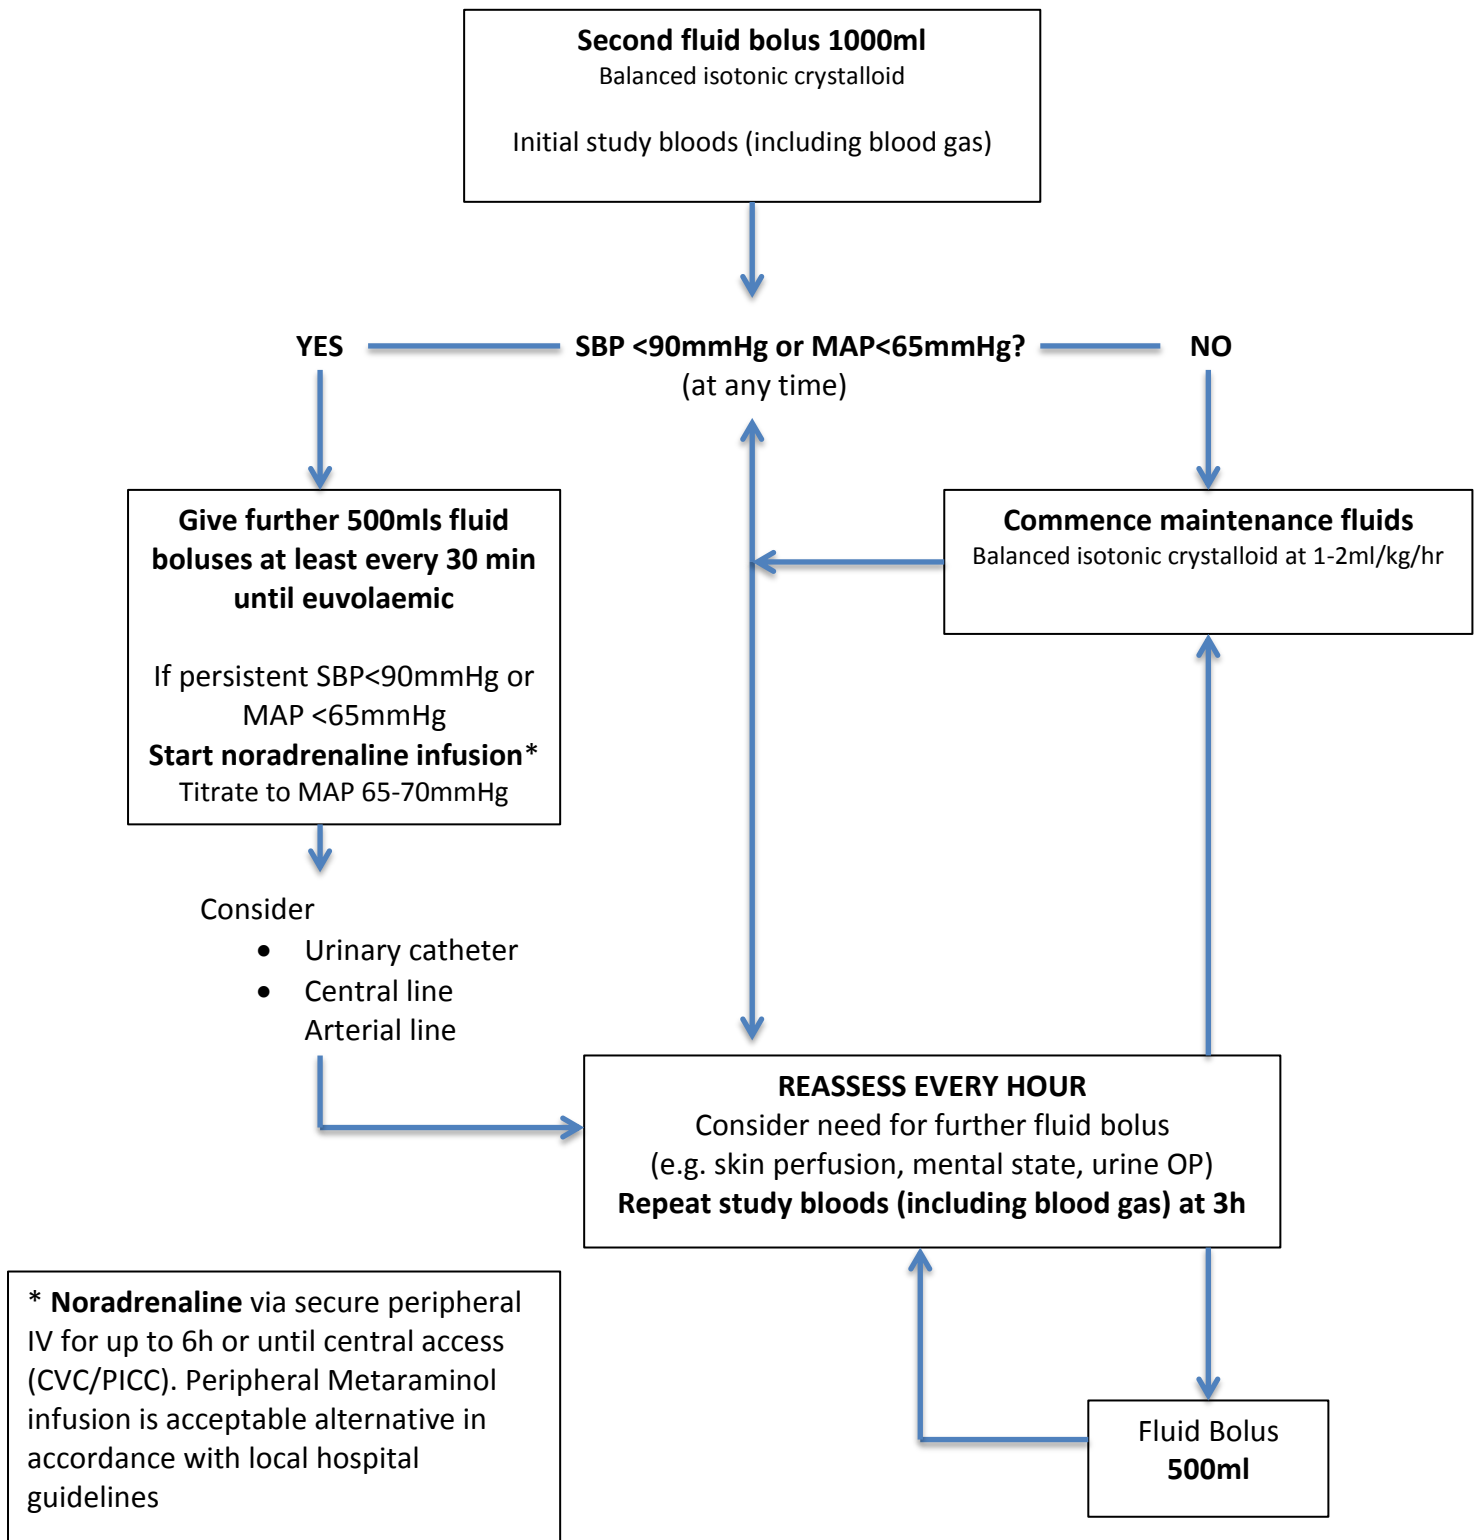

**Continue until 6h post randomization – thereafter management as per treating team**

**Repeat study bloods at 6h and 24h**
